# Supplementary material for: Multifunctional hierarchical 3-D ZnO superstructures directly grown over FTO glass substrates: enhanced photovoltaic and selective sensing applications
Source: Royal Society of Chemistry journal article supplement (doi:10.1039/c8ta04187c), 2018-01-01
Supplement: c8ta04187c1.pdf [file c8ta04187c1.pdf]

## Electronic Supplementary Information

### **Multifunctional Hierarchical 3-D ZnO Superstructures directly grown over FTO glass substrate: Enhanced Photovoltaic and Selective Sensing Applications**

Mohammad Shaad Ansari<sup>a</sup>, Avishek Banik<sup>a</sup>, Anamika Kalita<sup>b</sup>, Parameswar Krishnan Iyer<sup>b,c</sup> and  
Mohammad Qureshi<sup>a\*</sup>

<sup>a</sup>Department of Chemistry, Indian Institute Technology Guwahati, Guwahati, 781039, India

<sup>b</sup>Centre for Nanotechnology, Indian Institute of Technology Guwahati, Guwahati, 781039, India

<sup>c</sup> Department of Chemistry, Indian Institute of Technology Guwahati, Guwahati, 781039, India.

## Table of Contents

|       |                                                                                                                                                                |     |
|-------|----------------------------------------------------------------------------------------------------------------------------------------------------------------|-----|
| I.    | Chemical Structure of Bio-mass derived templating agent .....                                                                                                  | S3  |
| II.   | Probable Growth mechanism for in-situ grown hierarchical ZnO superstructures .....                                                                             | S3  |
| III.  | Cross sectional FESEM images of in-situ grown hierarchical ZnO superstructures .....                                                                           | S5  |
| IV.   | FESEM images of ZnO seed layer and complete morphological analysis of in-situ grown 1-D ZnO NWs, fabricated in absence of templating agent.....                | S6  |
| V.    | Digital Images related gas sensing experiment.....                                                                                                             | S7  |
| VI.   | Current-voltage (I-V) of both sensor devices.....                                                                                                              | S8  |
| VII.  | Gas sensing calibration plots for both sensor devices before measurements.....                                                                                 | S8  |
| VIII. | Steady state measurement for both sensor devices as a function of different concentration of NH <sub>3</sub> vapors .....                                      | S9  |
| IX.   | Response of both sensor devices as a function of different concentration of NH <sub>3</sub> vapors.....                                                        | S10 |
| X.    | Schematic representation of about probable sensing mechanism of NH <sub>3</sub> Vapors sensing.....                                                            | S10 |
| XI.   | A comparative study of the in-situ grown ZnO heterostructures, sensitized with N719 dye based photovoltaic devices with different reported ZnO structures..... | S11 |

## I. Chemical Structure of Bio-template

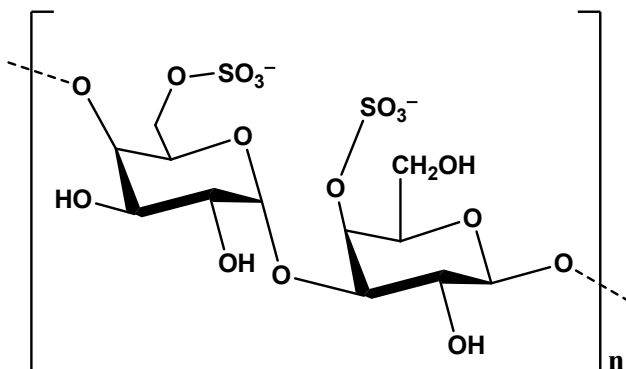

**Figure S1.** Chemical structure of bio-mass derived templating agent; “k-carrageenan”.

## II. Growth mechanism for the fabrication of ZnO superstructures

In accordance to morphological analysis, the plausible growth mechanism for the *in-situ* deposition of hierarchical 3-D ZnO superstructures over FTO substrate, under controlled hydrothermal reaction conditions is presented in figure S2. In general, growth process of the hierarchical 3-D superstructures can be triggered via two processes i.e., generation of primary structures and the crystal growth by means of secondary nucleation. It is anticipated that hierarchical 3-D superstructures are fabricated via assembling of primary ZnO structures i.e., 1-D ZnO NWs. Herein, water soluble and sulfate group containing an anionic polysaccharide “**k-carrageenan**” is utilized for monitoring the hetero epitaxial aggregated growth of 1-D nanocrystal. Natural hydrocolloid carrageenan is derived from red edible seaweed, having the repeating units of galactose and 3,6 anhydrogalactose (3,6-AG) and these repeating units are joined by alternating  $\alpha$ -1,3 and  $\beta$ -1,4 glycosidic linkages, as shown in figure S1.

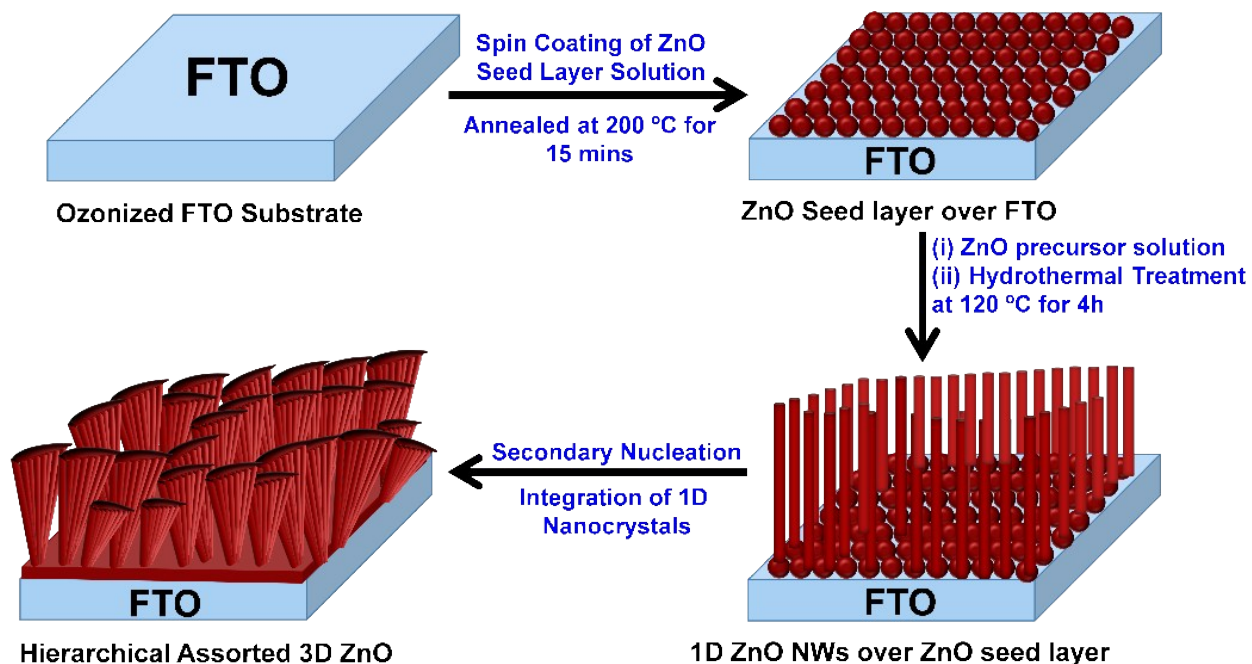

**Figure S2.** Schematic illustration of bio-mass derived template “k-Carrageenan” assisted in-situ growth of hierarchical 3D ZnO structures.

For direct deposition of hierarchical superstructures over conductive substrate, multinuclear ZnO seed layer was firstly deposited over precleaned ozonized FTO. This seed layer provided the specific growth sites for the epitaxial growth of 1-D ZnO nanocrystals. ZnO seeded FTO substrate (down side) was then immersed into the ZnO precursor solution and kept for hydrothermal reaction at 125 °C for 4 h for the growth of ZnO structures. ZnO precursor solution was prepared by dissolving the bio-template (1mg/mL) in the Milli-Q water which produced negative charged ions in solution because of hydroxyls and sulfate groups. After that, zinc nitrate was added into the reaction mixture and generated the positively charged  $Zn^{2+}$  ions in the solution. Thus, there is an electrostatic interaction between the negatively charged ( $OH^-/SO_3^-$ ) and positively charged ( $Zn^{2+}$ ) ions and generated adduct into the reaction mixture. Liquid ammonia ( $NH_3 \cdot H_2O$ ) is then added into the reaction mixture which instantly produced a white precipitate of  $Zn(OH)_2$ . On continual addition of  $NH_3 \cdot H_2O$ , white precipitate turned into

clear solution, associated to the formation of  $\text{Zn}(\text{OH})_4^{2-}$  and  $\text{Zn}(\text{NH}_3)_4^{2+}$  ions which acted as the crystal growth units for the formation of 1-D nanocrystals. Due to anisotropic nature of ZnO, growth units of ZnO favoured the crystal growth along the c-axis by minimizing the surface energy and encouraged the formation of epitaxial ZnO nanowires (NWs). In this growth mechanism, negatively charged k-carrageenan was utilized for the suppressing the crystal growth of ZnO NWs along the c-axis, resulting in the generation of non-uniform nanocrystals. During the secondary nucleation process, negatively charged biotemplate initiated the assembling of 1-D nanocrystals into a 3-D array to form hierarchical ZnO superstructures. After the complete nucleation of crystals, FTO substrate was expected to fully cover with the hierarchical 3-D ZnO superstructures. Therefore, we concluded that the highly oriented assembling of 1-D nanocrystals was controlled by the surface functionalities i.e., hydroxyl and sulfate groups present in the k-carrageenan. Moreover, generation of this kind of hierarchical structures is mainly attributed to anisotropic behaviour of ZnO crystal and dipole-dipole induced assembling of nanocrystals.

### III. Cross sectional FESEM images of in-situ grown hierarchical ZnO structures

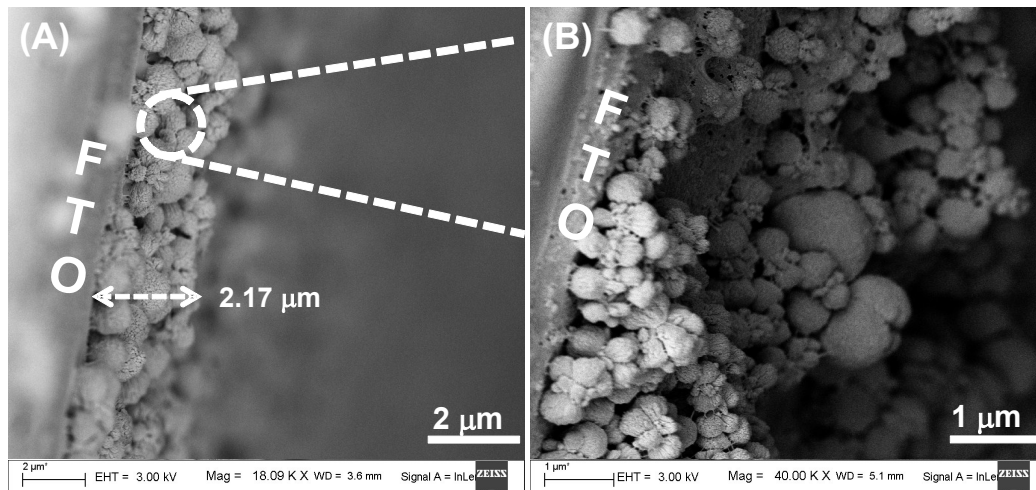

**Figure S3.** Images (A) and (B) show cross sectional view of in-situ deposited hierarchical 3D ZnO structures over FTO Glass Substrate.

**IV. FESEM images of ZnO seed layer and complete morphological analysis of in-situ grown 1-D ZnO NWs, fabricated in absence of templating agent**

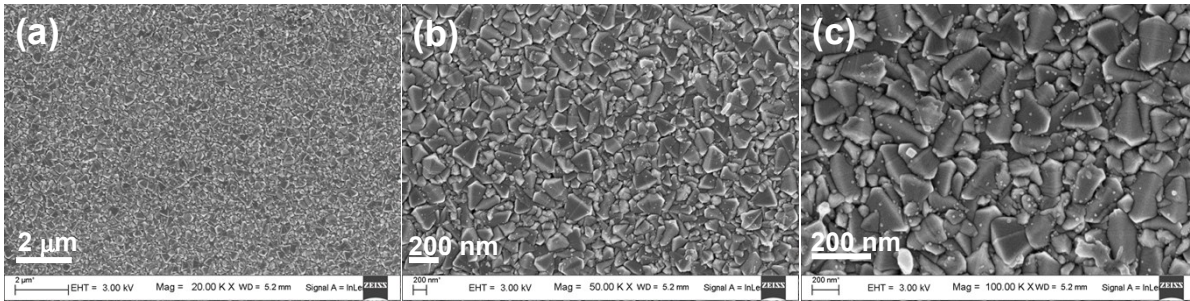

**Figure S4.** Images (a), (b) and (c) show top view of as-deposited seed layer of ZnO over FTO Glass Substrate.

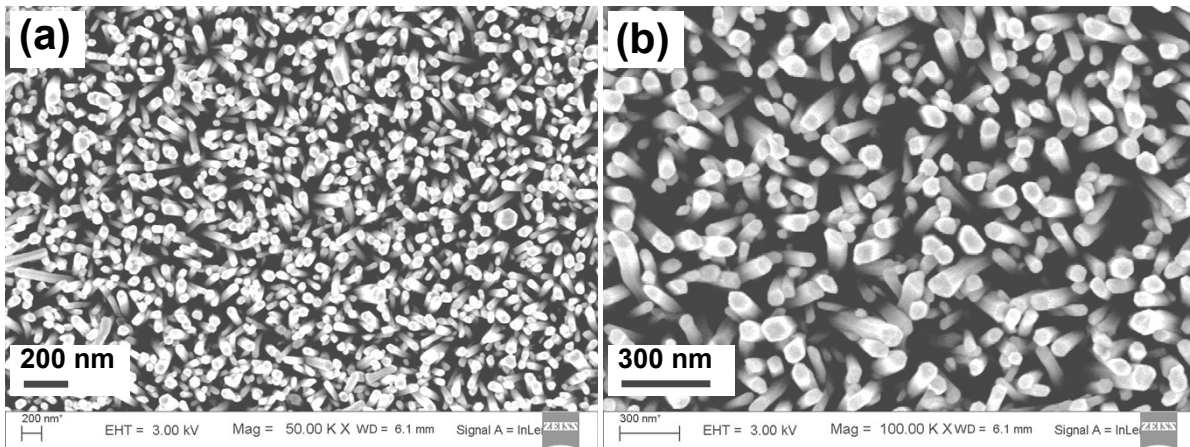

**Figure S5.** Images (a) and (b) show top view of as-deposited 1D ZnO NWs over FTO Glass Substrate.

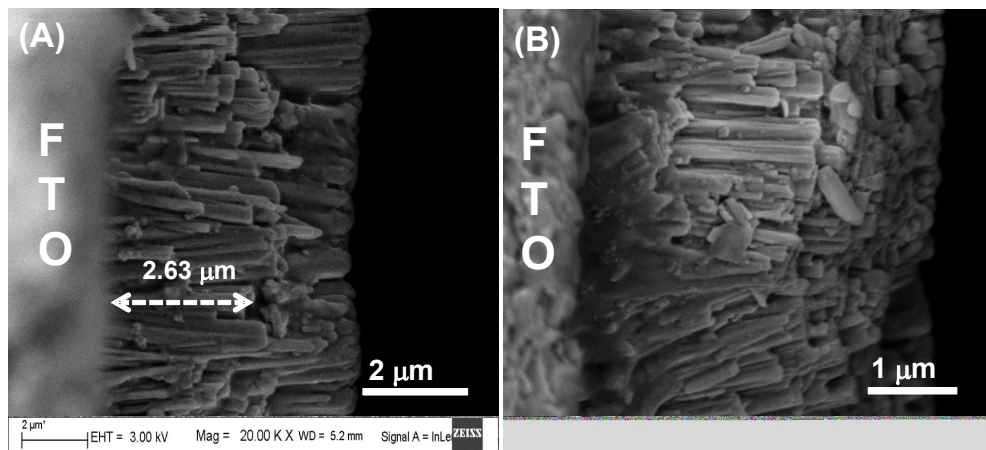



**Figure S6.** Images (a) and (b) show cross sectional view of as-deposited 1D ZnO NWs over FTO Glass Substrate.

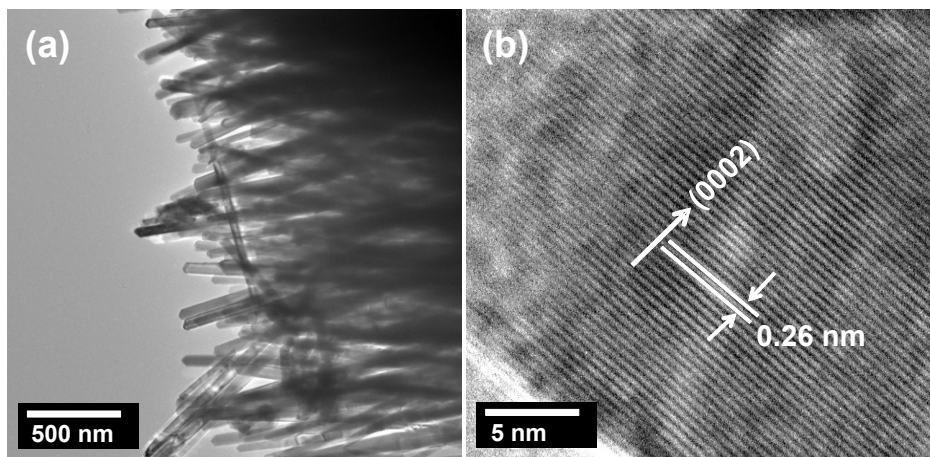

**Figure S7.** TEM image (a) shows the morphological features of in-situ grown 1-D ZnO NWs whereas high resolution TEM image (b) depicts the epitaxial growth 1D ZnO nanocrystals along the (0002) crystal plane.

## VI. Digital Images of gas sensing assembly

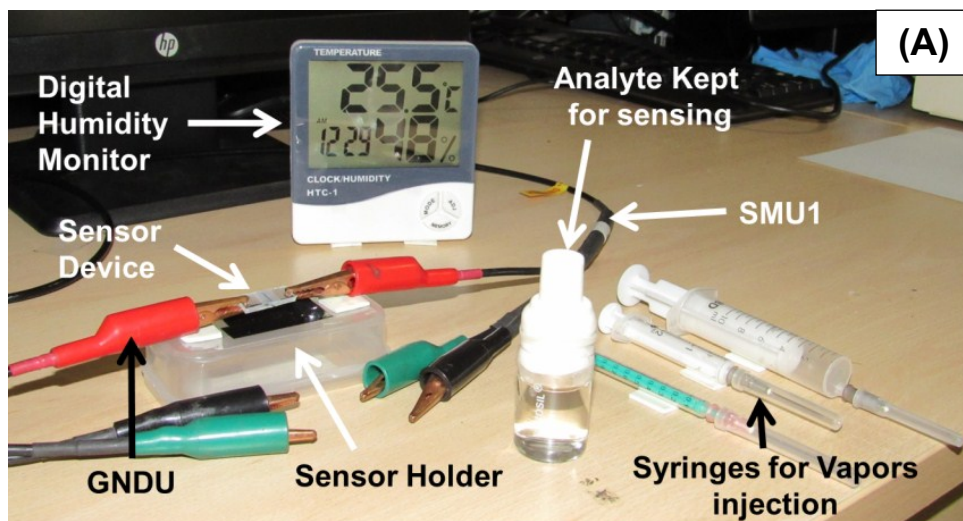

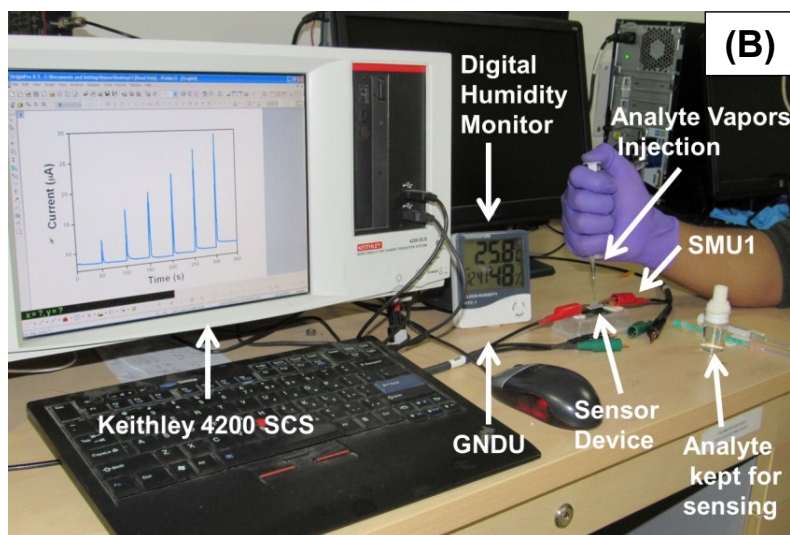

**Figure S8.** Digital Images (A & B) related to as-fabricated sensor device and experimental set-up for  $\text{NH}_3$  gas sensing assembly.

### VIII. Current-voltage (I-V) of both sensor devices

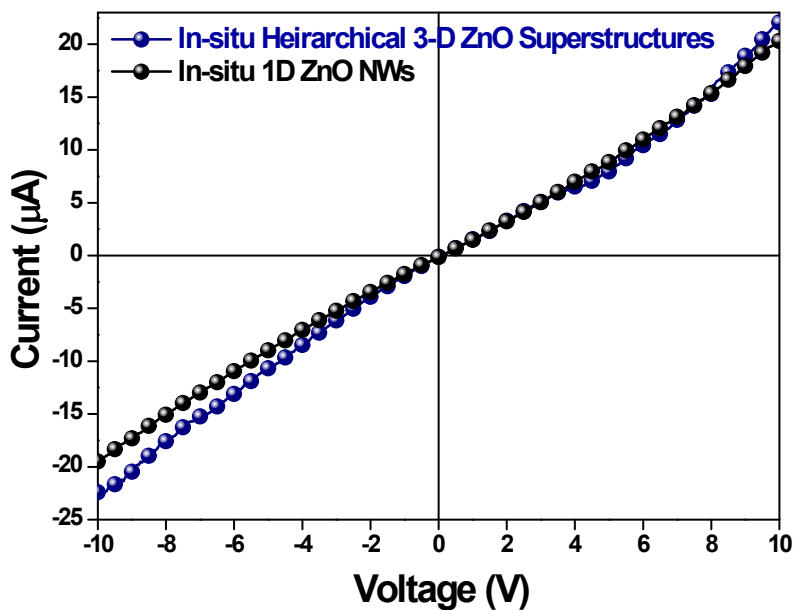

**Figure S9.** I-V curve for as-fabricated vapor phase sensing devices based on in-situ grown ZnO structures, recorded at room temperature with relative humidity of RH 53%.

### IX. Gas sensing calibration plots for both sensor devices before measurements



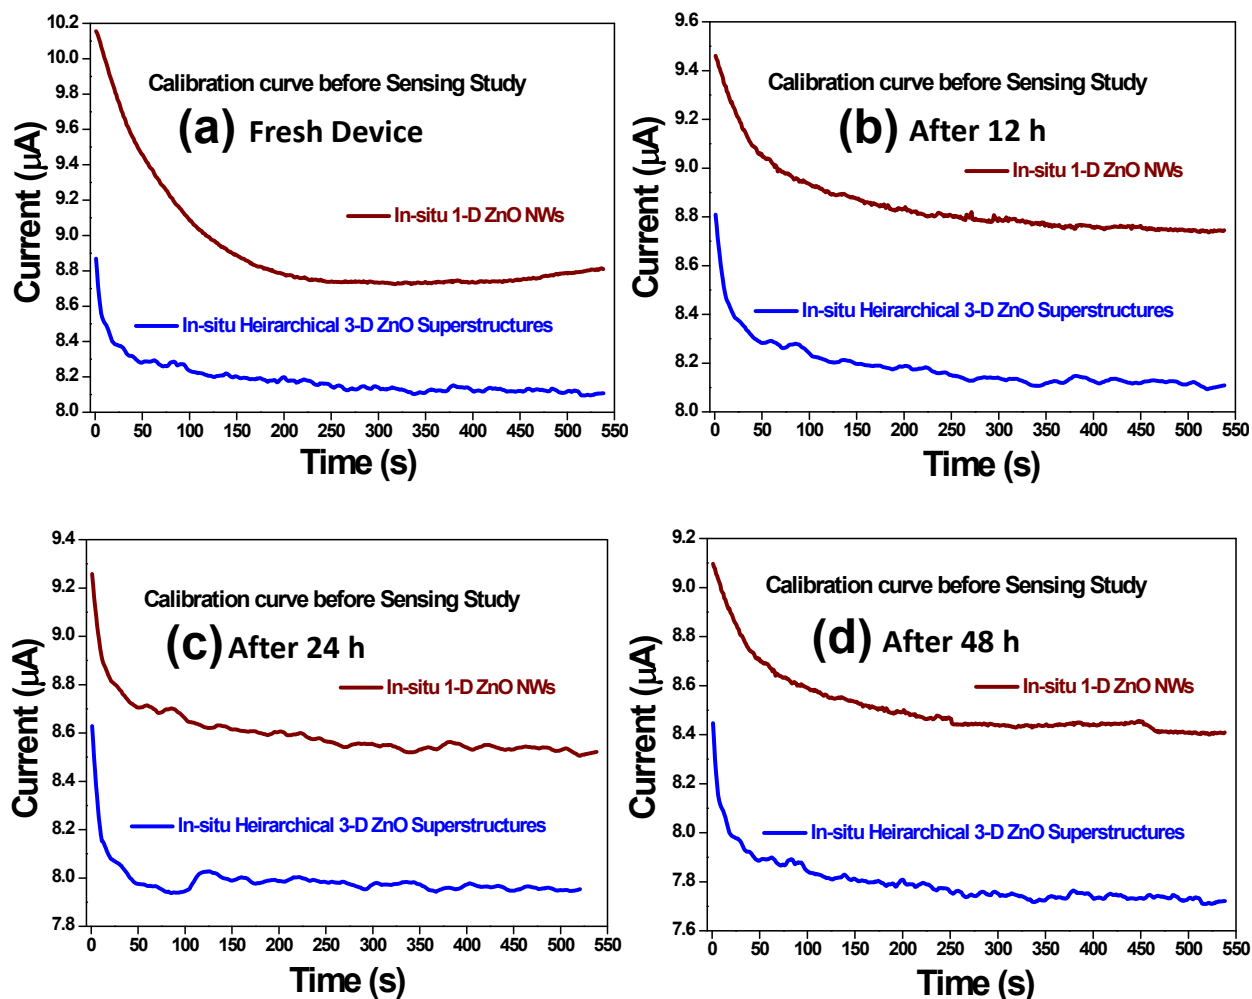

**Figure S10.** Gas sensing calibration curves for both in-situ grown heterostructures based sensor devices, measuring the current response as a function of time without injection of any analyte vapors with a regular interval upto few days under ambient condition at relative humidity of RH 52%.

**X. Steady state measurement for both sensor devices as a function of different concentration of  $\text{NH}_3$  vapors**

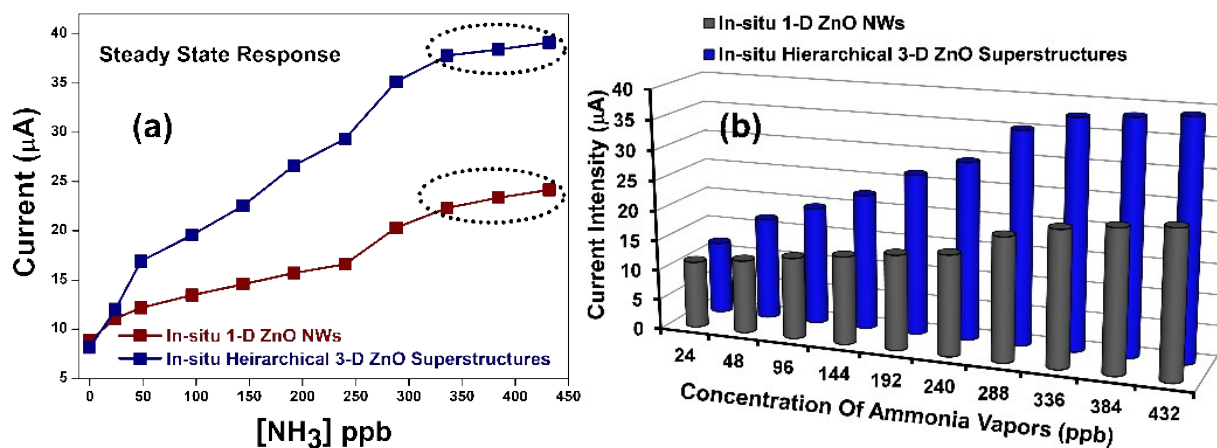

**Figure S11.** Plots (a) and (b) show the steady state current response for both vapor phase sensing devices based on in-situ grown ZnO structures with the different concentrations of NH<sub>3</sub> vapors, measured at room temperature with relative humidity level of RH 48%.

### XI. Response of both sensor devices as a function of different concentration of NH<sub>3</sub> vapors

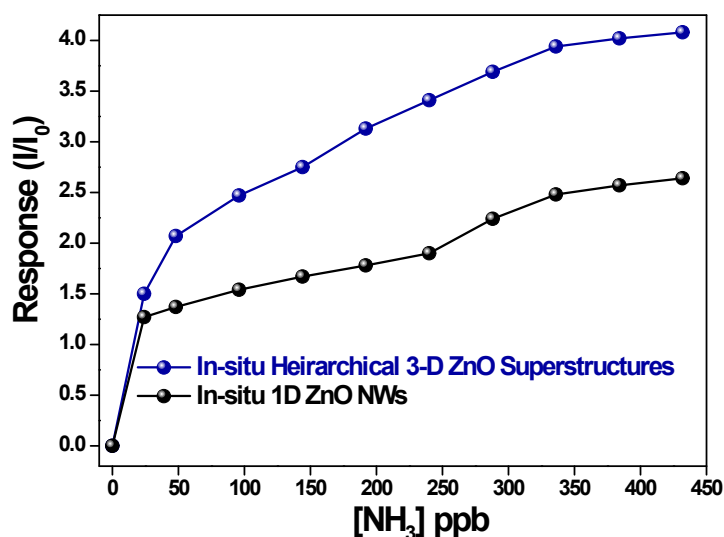

**Figure S12.** Response of both vapor phase sensing devices as a function of NH<sub>3</sub> concentration, performed at room temperature with relative humidity range of about RH 48%.

### XII. Schematic representation of about probable sensing mechanism of NH<sub>3</sub> Vapors sensing

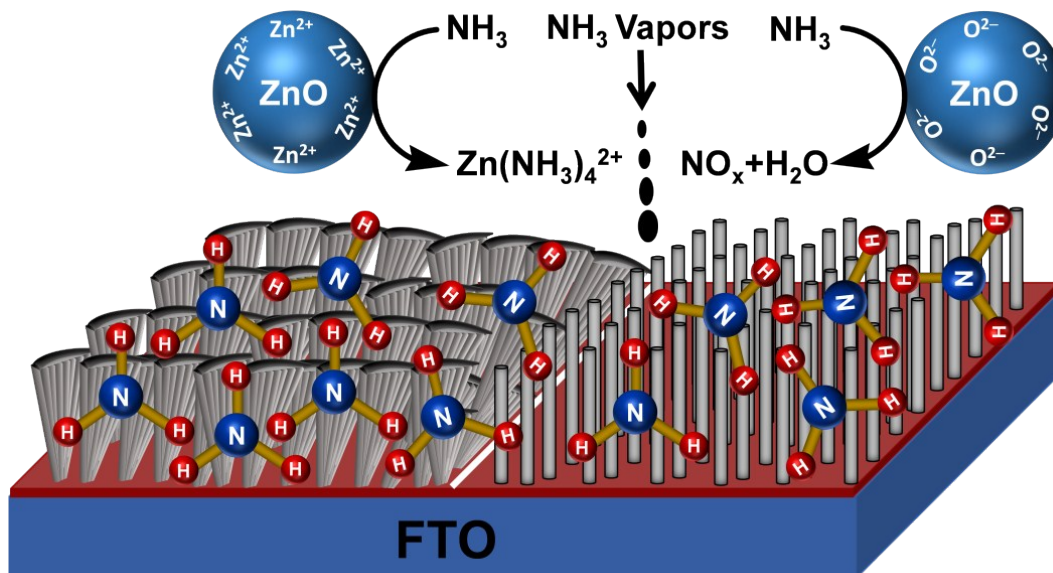

**Figure S13.** Schematic illustration represents the probable sensing mechanism.

**Table S1.** A comparative study of the in-situ grown ZnO heterostructures, sensitized with N719 dye based photovoltaic devices with different reported ZnO structures;

| Reported ZnO Structures | Reagents                                                | Sensitizer used | $\eta$ (%) | Reference |
|-------------------------|---------------------------------------------------------|-----------------|------------|-----------|
| ZnO porous nanosheets   | Urea                                                    | N719            | 3.7        | 1         |
| ZnO Nano flowers        | NH <sub>3</sub>                                         | N719            | 1.9        | 2         |
| ZnO Nanosheets          | Urea: H <sub>2</sub> O                                  | N719            | 3.9        | 3         |
| Branched ZnO Nanowires  | Hexamethylenetetramine (HMTA)<br>Polyethylenimine (PEI) | N719            | 1.51       | 4         |
| ZnO nanoflowers         | NH <sub>3</sub>                                         | N719            | 5.11       | 5         |
| ZnO Nanoforest          | HMTA, PEI                                               | N719            | 2.63       | 6         |

|                                                 |                                           |              |             |                           |
|-------------------------------------------------|-------------------------------------------|--------------|-------------|---------------------------|
| Cactus ZnO                                      | HMTA, NH <sub>3</sub>                     | N719         | 3.09        | 7                         |
| ZnO Caterpillar-like                            | HMTA                                      | N719         | 5.20        | 8                         |
| Hierarchical ZnO architectures                  | HMTA, trisodium citrate                   | N719         | 1.13        | 9                         |
| Cauliflower-like ZnO                            | Urea                                      | N719         | 2.18        | 10                        |
| Nanospikes decorated ZnO sheets                 | Polyethylene glycol (PEG)                 | N719         | 2.51        | 11                        |
| ZnO Nanowire Array                              | HMTA, NH <sub>3</sub>                     | N719         | 1.7         | 12                        |
| ZnO Nanowire Array                              | HMTA, PEI                                 | N719         | 2.1         | 13                        |
| ZnO Nanofibers                                  | Not mentioned (Sputtering)                | Indoline dye | 1.66        | 14                        |
| ZnO Nanoribbon                                  | HMTA, NaOH                                | N719         | 2.41        | 15                        |
| Hierarchical ZnO Nanorod/Nanosheet              | Not mentioned (Electrodeposition)         | N719         | 3.12        | 16                        |
| Hierarchical ZnO nanowire-nanosheet             | Not mentioned (Electrodeposition)         | N719         | 4.80        | 17                        |
| ZnO Nanoflakes                                  | NaOH                                      | N719         | 4.50        | 18                        |
| ZnO nanorod/nanoparticle hierarchical structure | KOH                                       | N719         | 3.63        | 19                        |
| 1-D ZnO Nanowires                               | NH <sub>3</sub>                           | N719         | 2.57        | Present Manuscript        |
| <b>Hierarchical 3-D ZnO Superstructures</b>     | <b>k-carrageenan, Dil. NH<sub>3</sub></b> | <b>N719</b>  | <b>3.83</b> | <b>Present Manuscript</b> |

## References

1. X. Y. Wang, Z. P. Tian, T. Yu, H. M. Tian, J. Y. Zhang, S. K. Yuan, X. B. Zhang, Z. S. Li and Z. G. Zou, *Nanotechnology*, 2010, **21**, 1–5.
2. C. Y. Jiang, X. W. Sun, G. Q. Lo, D. L. Kwong and J. X. Wang, *Appl. Phys. Lett.*, 2007, **90**, 1–3.
3. E. Hosono, S. Fujihara, I. Honna and H. S. Zhou, *Adv. Mater.*, 2005, **17**, 2091–2094.
4. H. M. Cheng, W. H. Chiu, C. H. Lee, S. Y. Tsai and W. F. Hsieh, *J. Phys. Chem. C*, 2008, **112**, 16359–16364.
5. B. Kilic, T. Gunes, I. Besirli, M. Sezginer and S. Tuzemen, *Appl. Surf. Sci.*, 2014, **318**, 32–36.
6. S. H. Ko, D. Lee, H. W. Kang, K. H. Nam, J. Y. Yeo, S. J. Hong, C. P. Grigoropoulos and H. J. Sung, *Nano Lett.*, 2011, **11**, 666–671.
7. P. Baviskar, R. Gore, A. Ennaoui and B. Sankapal, *Mater. Lett.*, 2014, **116**, 91–93.
8. M. McCune, W. Zhang and Y. L. Deng, *Nano Lett.*, 2012, **12**, 3656–3662.
9. S. B. Zhu, L. M. Shan, X. N. Chen, L. He, J. J. Chen, M. Jiang, X. L. Xie and Z. W. Zhou, *RSC Adv.*, 2013, **3**, 2910–2916.
10. Y. Q. Wang, X. Cui, Y. Zhang, X. R. Gao and Y. M. Sun, *J. Mater. Sci. Technol.*, 2013, **29**, 123–127.
11. S. Ameen, M. S. Akhtar and H. S. Shin, *Chem. Eng. J.*, 2012, **195**, 307–313.
12. Y. F. Gao, M. Nagai, T. C. Chang and J. J. Shyue, *Cryst. Growth Des.*, 2007, **7**, 2467–2471.
13. C. K. Xu, P. Shin, L. L. Cao and D. Gao, *J. Phys. Chem. C*, 2010, **114**, 125–129.
14. O. Lupan, V. M. Guérin, L. Ghimpu, I. M. Tiginyanu and T. Pauporté, *Chem. Phys. Lett.*, 2012, **550**, 125–129.
15. Z. Li, D. Bi, Y. Zhao, R. Liu, J. Ye and Y. Zhou, *Electrochim. Acta*, 2018, **262**, 124–134.

16. J. Qiu, M. Guo and X. Wang, *ACS Appl. Mater. Interfaces*, 2011, **3**, 2358–2367.
17. F. Xu, M. Dai, Y. Lu and L. Sun, *J. Phys. Chem. C*, 2010, **114**, 2776–2782.
18. C. Zhao, J. Zhang, Y. Hu, N. Robertson, P. A. Hu, D. Child, D. Gibson and Y. Q. Fu, *Sci. Rep.*, 2015, **5**, 17750.
19. R. Gao, Y. Cui, X. Liu, L. Wang and G. Cao, *J. Mater. Chem. A*, 2014, **2**, 4765–4770.
